# Supplementary material
Source: PubMed Central journal article supplement (PMC9767644)
Supplement: mmc1.pdf [file mmc1.pdf]

# THE LANCET

## Microbe

### Supplementary appendix

This appendix formed part of the original submission. We post it as supplied by the authors.

Supplement to: Accordini S, Cordioli M, Pomari E, Tacconelli E, Castillett C. People with asymptomatic or unrecognised infection potentially contribute to monkeypox virus transmission. *Lancet Microbe* 2022; published online Dec 20. [https://doi.org/10.1016/S2666-5247\(22\)00379-2](https://doi.org/10.1016/S2666-5247(22)00379-2).

## Supplementary Appendix

### **People with asymptomatic or unrecognised infection potentially contribute to monkeypox virus transmission**

Silvia Accordini<sup>1#</sup>, Maddalena Cordioli<sup>2,3#</sup>, Elena Pomari<sup>1</sup>, Evelina Tacconelli<sup>3</sup> and Concetta Castilletti<sup>1\*</sup>

<sup>1</sup>Department of Infectious, Tropical Diseases and Microbiology, IRCCS Sacro Cuore Don Calabria Hospital, Negrar di Valpolicella (Verona), Italy

<sup>2</sup>Division of Infectious Diseases, Department of Diagnostic and Public Health, University of Verona, Verona, Italy

<sup>3</sup>Division of Infectious Diseases, Department of Medicine, Verona University Hospital, Verona, Italy

#These authors equally contributed

\*Correspondence.

Concetta Castilletti ([concetta.castilletti@sacrocuore.it](mailto:concetta.castilletti@sacrocuore.it))

### **Table of contents**

Table

**Table: MPXV virological findings**

| Days from initial visit | real-time-PCR (Ct values)* |             |        |                    |                    | Immunofluorescence titre# |       |      |
|-------------------------|----------------------------|-------------|--------|--------------------|--------------------|---------------------------|-------|------|
|                         | Anal swab                  | Whole blood | Plasma | Penile lesion swab | Oropharyngeal swab | IgM                       | IgG   | IgA  |
| 0                       | 26,8                       | >45         | 34,71  | >45                | >45                | <1:20                     | <1:20 | 1:80 |
| 13                      | nd                         | nd          | nd     | nd                 | nd                 | 1:20                      | 1:160 | 1:20 |
| 79                      | nd                         | nd          | nd     | nd                 | nd                 | <1:20                     | 1:320 | 1:20 |
| 115                     | nd                         | nd          | nd     | nd                 | nd                 | <1:20                     | 1:320 | 1:20 |

\* Ct: Cycle threshold using Real-Star Orthopoxvirus PCR Kit (Altona Diagnostics GmbH) as screening PCR. A Sanger sequencing of the amplicon obtained from an end point PCR (in-house method) targeting the complete gene for the viral haemagglutinin (HA) was used to characterize the PCR result. nd: not done

# Indirect immunofluorescence antibody (IFA) assay with homemade slides prepared with Vero-E6 cells infected with the cowpox virus Taunton strain, as previously described.<sup>1</sup>

**References**

<sup>1</sup>Puro V, Fusco FM, Castilletti C, et al. Occupational transmission of an orthopoxvirus infection during an outbreak in a colony of *Macaca tonkeana* in Lazio Region, Italy, 2015. *Zoonoses Public Health* 2018; 65: 578–83.
